# Supplementary material for: Unusual C–H bond activation—aldol condensation of aromatic aldehydes with the methyl group of a carbene-like triosmium cluster
Source: Royal Society of Chemistry journal article supplement (doi:10.1039/b200707j), 2002-01-01
Supplement: b200707j.doc [file b200707j.doc]

Unusual C-H bond activation – aldol condensation of aromatic aldehydes with the methyl group of a carbene-like triosmium cluster.

Sergey P. Tunik, Irina A. Balova, Maxim E. Borovitov, Ebbe Nordlander, Matti Haukka, Tapani A. Pakkanen

# Experimental

### **General comments**

The starting compound [HOs3(CO)10{**-**1:**1OC4H2-CCH3]1 **(1)** was prepared according to published procedure, commercially available reagents: benzaldehyde **(2)**, 2-hydroxybenzaldehyde **(3)**, 4-hydroxybenzaldehyde **(4)**, 2-nitrobenzaldehyde **(5)**, 4-nitrobenzaldehyde **(6)** were used without further purification. All solvents, dichloromethane, chloroform, hexane and diethyl ether, were distilled over appropriate drying agents under an atmosphere of nitrogen prior to use. Infrared spectra were recorded using a Specord-M80 and a Nicolet Avatar 360 FTIR spectrometers. Fast Atom Bombardment (FAB+) mass spectra were obtained on a Trio-2000 instrument; 3-nitrobenzyl alcohol was used as a matrix and CsI as the calibrant. The Electron Impact (EI) mass spectra were obtained on a MX-1320 instrument (ionizing potential 70eV). The isotopic distribution patterns observed in the mass spectra fit completely to the calculated patterns. The 1H NMR and 13C NMR spectra were recorded on a Bruker AX-300 and a Varian Unity 300 MHz spectrometers. Solvent resonances were used as internal standards. Column chromatography was performed using Merck Kieselgel Silica 5/40 mesh.

***Reaction of [HOs3(CO)10{-1:1(OC4H2-CCH3] with 2.***

[HOs3(CO)10{**-**1:**1OC4H2-CCH3] (100 mg, 0.106 mmol) and C6H5-CHO **(2)** (22 mg, 0.212 mmol) were dissolved in 3 cm3 of diethyl ether and stirred overnight at room temperature. The solvent was removed *in* *vacuo*, the resultant residue was dissolved in a minimum amount of dichloromethane and separated by column chromatography using hexane/dichloromethane = 3/1 mixture as an eluant. The chromatographic workup gave one main dark-green band containing [HOs3(CO)10OC4H2-CCH=CH-C6H5] **(2a)**. Addition of hexane and removal of the solvent *in* *vacuo* afforded dark green crystals of **2a**, (86 mg, 76 %). *H*(CDCl3) 8.13 - 8.03 (2H, AB system, J = 15 Hz, double bond protons), 7.96, 7.04 (2H, AB, J = 3 Hz, furane ring protons), 7.78-7.35 (5H, m, phenyl protons), -15.07 (1H, s, *µ*-HOs); *C*(CDCl3) 206.8, 186.1, 183.9, 182.8, 181.7,

177.0, 176.7, 175.8, 174.8, 171.6, 170.9, 170.5, 169.2 (10 CO and 3 coordinated carbons of the furane ring); 148.6, 146.0, 130.6, 124.9, 122.6, 129.6, 121.0, 120.3 (noncoordinated carbons of double bond, phenyl and furane rings); DEPT 135 (CDCl3): **148.6, 146.0, 130.6, 124.9, 122.6, 121.0, 120.3 (CH signals of double bond, furane and phenyl rings); max/cm-1 (CO) 2100m, 2068sh, 2056vs, 2002sh, 2012s, 1988sh; *m/z* (FAB) 1033 (M+), 1005 (M+ - 1 CO), 977 (M+ - 2 CO), 949 (M+ - 3 CO), 921 (M+ - 4 CO), 893 (M+ - 5 CO); Single crystals of **7** suitable for X-ray analysis have been grown from pentane/hexane at room temperature.

***Reaction of [HOs3(CO)10{-1:1OC4H2-CCH3] with 3.***

[HOs3(CO)10{-1:1OC4H2-CCH3] (82 mg, 0.087 mmol), 2-HO-C6H4-CHO (**3**) (21 mg, 0.174 mmol) and Et3N (5 mg) were dissolved in 3 cm3 of diethyl ether and stirred overnight at room temperature. The solvent was removed *in vacuo* and the resultant residue was dissolved in a minimum amount of dichloromethane. Column chromatography workup, eluant dichloromethane/hexane = 1/1, gave a dark brown band containing [HOs3(CO)10(OC4H2-CCH=CH-C6H4-OH-2] **(2d)**. Addition of hexane and removal of the solvent *in* *vacuo* afforded black-brown crystalls of **2d** (61 mg, 68 %). *H*(CDCl3) 8.56, 8.18 (2H, AB system, J=15 Hz, double bond protons), 7.94, 7.03 (2H, AB system, J = 3 Hz, furane ring protons), 7.83-6.81 (5H, a set of multiplets, phenyl protons), 1.60 (1H, br, s, OH), -15.10 (1H, s, *µ*-HOs); *C*(CDCl3) 206.7, 185.6, 185.4, 184.7, 183.5, 179.5, 179.1, 178.5, 177.5, 174.8, 174.1, 173.3, 172.5 (10 CO and 3 coordinated carbons), 155.3, 153.7, 147.3, 137.7, 132.6, 132.3, 128.2, 124.6, 121.6, 116.8 (noncoordinated carbons of double bond, phenyl and furane rings); DEPT 135 (CDCl3): **153.7, 147.3, 137.7, 132.6, 132.3, 128.2, 121.6, 116.8 (CH signals of double bond, furane and phenyl rings); max/cm-1 (CO) 2100m, 2059vs, 2022sh, 2012s, 1988sh; *m/z* (FAB) 1050 (M+), 1026 (M+ - 1 CO), 994 (M+ - 2 CO), 966 (M+ - 3 CO), 938 (M+ - 4 CO), 910 (M+ - 5 CO).

***Reaction of [HOs3(CO)10{-1:1OC4H2-CCH3] with 4.***

[HOs3(CO)10{-1:1OC4H2-CCH3] (100mg, 0.106 mmol), 4-HO-C6H4-CHO (**4**) (26 mg, 0.212 mmol) and Et3N (5 mg) were dissolved in 5 cm3 of diethyl ether and stirred 24 hours at room temperature. The solvent was removed *in vacuo* and the resultant residue was dissolved in a minimum amount of dichloromethane. Column chromatography workup, eluant dichloromethane, gave a black-brown band containing [Os3(CO)10(OC4H2-CCH=CH-C6H4-OH-4] **(2e)**. Addition of hexane and removal of the solvent *in* *vacuo* afforded black-brown crystalls of **2e** (28 mg, 25 %). *H*(CDCl3) 8.06-7.1 (6H, m, phenyl and furane ring protons), 7.74 and 6.89 (2H, AB system, J = 9 Hz, double bond protons), 1.60 (1H, s, br, OH), -15.08 (1H, s, *µ*-HOs);

max/cm-1 (CO) 2100m, 2059vs, 2022sh, 2012s, 1988sh; *m/z* (EI) 1026 (M+ - 1 CO), 994 (M+ - 2 CO), 966 (M+ - 3 CO), 938 (M+ - 4 CO), 910 (M+ - 5 CO), 882 (M+ - 6 CO), 854 (M+ - 7 CO), 826 (M+ - 8 CO), 798 (M+ - 9 CO), 770 (M+ - 10 CO).

***Reaction of [HOs3(CO)10{-1:1OC4H2-CCH3] with 5.***

[HOs3(CO)10{**-**1:**1(OC4H2)-CCH3] (100mg, 0.106mmol), 2-NO2-C6H4-CHO (**5)** (32 mg, 0.212 mmol) and Et3N (5 mg) were dissolved in 5 cm3 of diethyl ether and stirred 4 hours at room temperature. The solvent was removed *in vacuo* and the resultant residue was dissolved in a minimum amount of dichloromethane. Column chromatography workup, eluant hexane/dichloromethane = 3/1, gave a dark-green band containing [HOs3(CO)10(OC4H2-CCH=CH-C6H4-NO2-2] **(2b)**. Addition of hexane and removal of the solvent *in* *vacuo* afforded dark-green crystalls of **2b** (36 mg, 38 %). *H*(CDCl3) 8.72 (1H, J =16 Hz, 1H of the double bond AB system protons), 8.08-7.11 (7H, m, a double bond proton together with the signals of phenyl and furane rings); max/cm-1 (CO) 2100m, 2068sh, 2052vs, 2011s, 1989sh; *m/z* (EI) 1051 (M+ - 1 CO), 911 (M+ - 6 CO), 883 (M+ - 7 CO), 855 (M+ - 8 CO), 827 (M+ - 9 CO), 799 (M+ - 10 CO).

***Reaction of [HOs3(CO)10{-1:1OC4H2-CCH3] with 6.***

[HOs3(CO)10{**-**1:**1(OC4H2)-CCH3] (83 mg, 0.088 mmol) and 4-NO2-C6H4-CHO (**6**) (27 mg, 0.176 mmol) and Et3N (10 mg) were dissolved in 3 cm3 of diethyl ether and stirred overnight at room temperature. The solvent was removed *in vacuo* and the resultant residue was dissolved in a minimum amount of dichloromethane. Column chromatography workup, eluant hexane/dichloromethane = 3/1, gave a dark-green band containing [HOs3(CO)10OC4H2-CCH=CH-C6H4-NO2-4] **(2c)**. Addition of hexane and removal of the solvent *in* *vacuo* afforded dark-green crystals of **2c** (37 mg, 39 %). *H*(CDCl3) 8.28, and 8.00-7.14 (6H, m, phenyl and furane ring protons), 8.12 and 8.01 (2 H, d, J = 16 Hz double bond protons), -14.96 (1H, s, *µ*-HOs); max/cm-1 (CO) 2100m, 2068sh, 2052vs, 2012s, 1988sh; *m/z* (FAB) 1051 (M+ - 1 CO), 1023 (M+ - 2 CO), 995 (M+ - 3 CO), 967 (M+ - 4 CO), 939 (M+ - 5 CO), 911 (M+ - 6 CO).

## References

1. M.G. Karpov, S. P. Tunik, V. R. Denisov, G. L. Starova, A. B. Nikol’skii, F. M. Dolgushin, A. I. Yanovskii, Yu. T*.* Struchkov, *J. Organomet. Chem*., 1995, **485**, 219.
